# Supplementary material for: Defective porous carbon microrods derived from fullerenes (C70) as high-performance electrocatalysts for the oxygen reduction reaction
Source: Royal Society of Chemistry journal article supplement (doi:10.1039/d1nr07198j), 2021-12-02
Supplement: d1nr07198j1.pdf [file d1nr07198j1.pdf]

## Supporting Information

### **Defective Porous Carbon Microrods Derived from Fullerenes (C<sub>70</sub>) as High-performance Electrocatalysts for Oxygen Reduction Reaction**

Zhimin He, Peng Wei, Ziqian Guo, Ting Xu, Jiantao Han, Takeshi Akasaka, Kun Guo\*  
and Xing Lu\*

State Key Laboratory of Materials Processing and Die & Mould Technology, School  
of Materials Science and Engineering, Huazhong University of Science and  
Technology, 1037 Luoyu Road, Wuhan, 430074, China

E-mail: [kun.guo.89@gmail.com](mailto:kun.guo.89@gmail.com), [lux@hust.edu.cn](mailto:lux@hust.edu.cn)

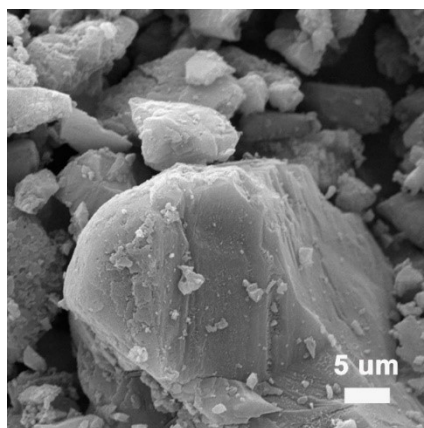

**Figure S1** SEM image of pristine C<sub>70</sub> powder

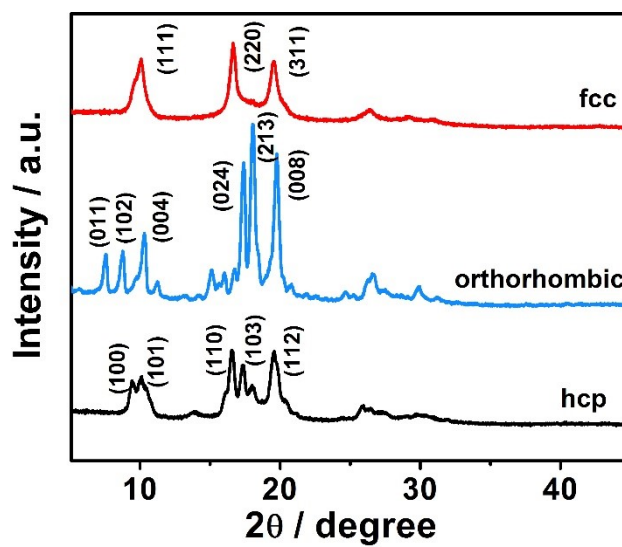

**Figure S2** XRD patterns of pristine C<sub>70</sub> powder (black), C70MRs (blue) and C70MRs-800 (red).

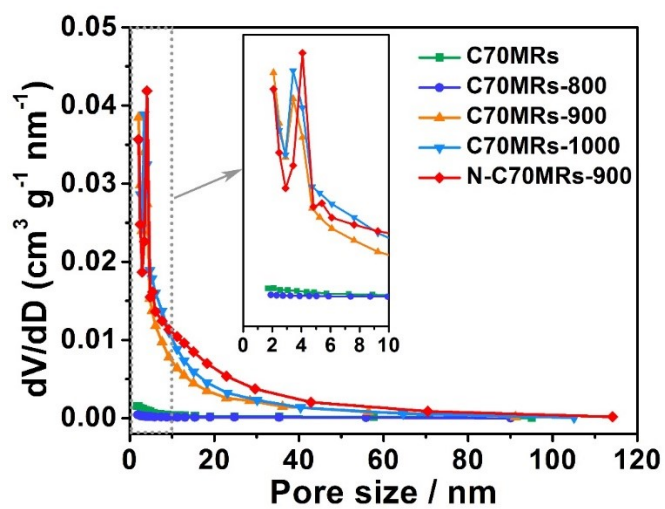

**Figure S3** Pore size distributions of the as-prepared samples.

**Table S1** Specific surface area and average pore size of different samples

| Catalysts    | Specific surface area<br>( $\text{m}^2 \text{g}^{-1}$ ) | Average pore size<br>(nm) |
|--------------|---------------------------------------------------------|---------------------------|
| C70MRs       | 11                                                      | 1.3                       |
| C70MRs-800   | 33                                                      | 1.4                       |
| C70MRs-900   | 620                                                     | 3.6                       |
| C70MRs -1000 | 709                                                     | 3.6                       |
| N-C70MRs-900 | 846                                                     | 3.8                       |

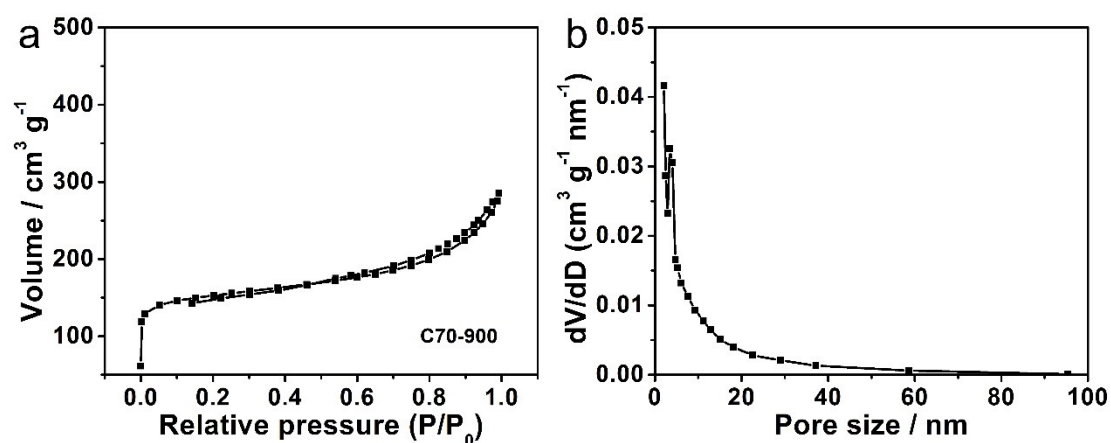**Figure S4** (a)  $\text{N}_2$  adsorption/desorption isotherm and (b) pore size distribution of C70-900.**Table S2** Surface compositions of different samples.

| Catalysts    | C (at. %) | O (at.%) | N (at.%) |
|--------------|-----------|----------|----------|
| C70MRs       | 97.54     | 2.46     | 0        |
| C70MRs-800   | 97.48     | 2.52     | 0        |
| C70MRs-900   | 94.77     | 5.23     | 0        |
| C70MRs -1000 | 94.97     | 5.03     | 0        |
| N-C70MRs-900 | 93.07     | 5.15     | 1.78     |

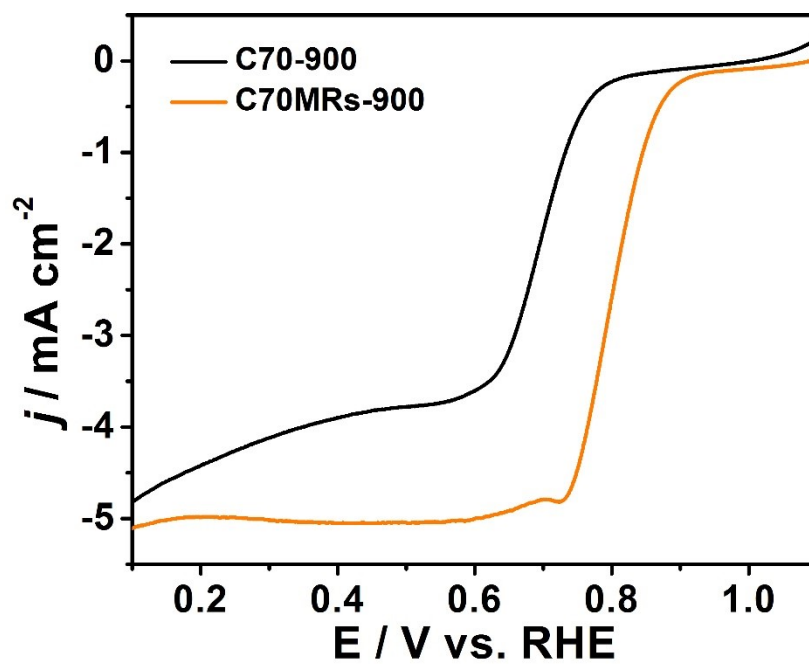

**Figure S5** LSV curves of C70-900 and C70MRs-900 at a scan rate of  $10 \text{ mV s}^{-1}$  and a rotation speed of 1600 rpm in 0.1 M KOH electrolyte.

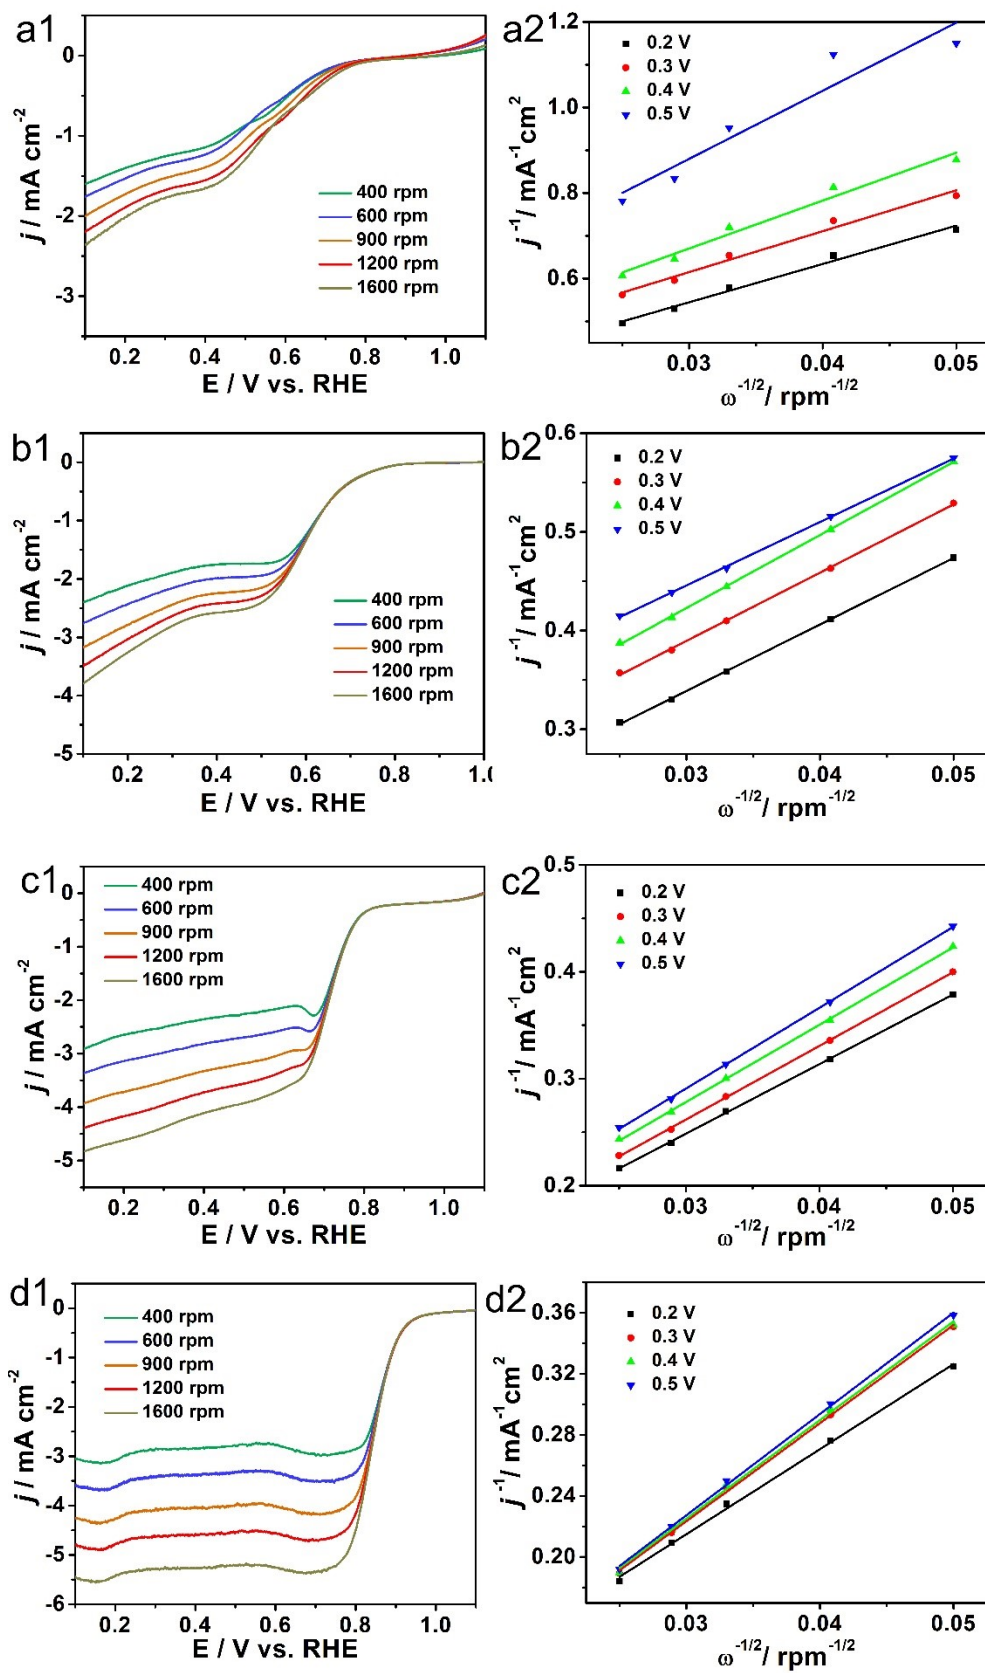

**Figure S6** (a1-d1) LSV curves of C70MRs, C70MRs-800, C70MRs-1000 and 20% Pt/C catalysts at different rotation speeds in the range of 400 to 1600 rpm in 0.1 M KOH electrolyte, and (a2-d2) the corresponding K-L plots.

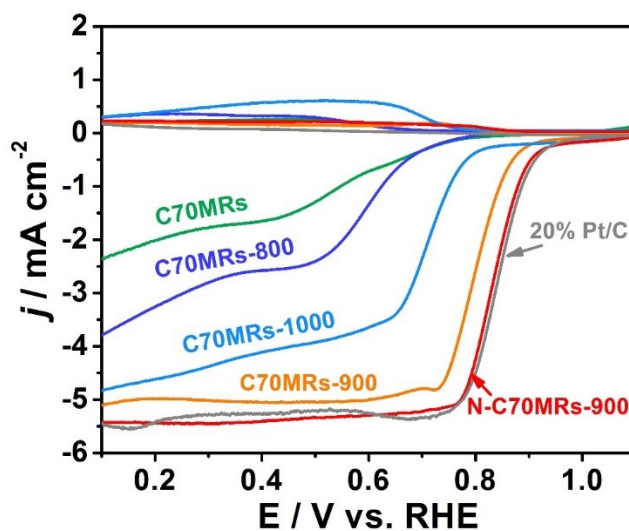

**Figure S7** RRDE measurements of the as-prepared samples and 20% Pt/C at a scan rate of  $10 \text{ mV s}^{-1}$  and a rotation speed of 1600 rpm in 0.1 M KOH solution.

**Table S3** Comparison of the ORR performance of C70MRs-900 and N-C70MRs-900 with recently reported metal-free catalysts in 0.1 M KOH solution.

| Catalyst                  | $E_0$ (V) | $E_{1/2}$ (V) | $J_L$ ( $\text{mA cm}^{-2}$ ) | Ref.      |
|---------------------------|-----------|---------------|-------------------------------|-----------|
| C70MRs-900                | 0.981     | 0.802         | -5.11                         | This work |
| N-C70MRs-900              | 1.076     | 0.836         | -5.42                         | This work |
| NOPHC <sub>10</sub> -900  | 0.90      | 0.77          | -4.2                          | S1        |
| NCN-1000-5                | 0.95      | 0.82          | -6.43                         | S2        |
| N-CNT-3h                  | 0.95      | 0.83          | -                             | S3        |
| N-hG6                     | 0.91      | 0.833         | -5.28                         | S4        |
| NKCNP <sub>s</sub> -900   | 0.92      | 0.79          | -5.31                         | S5        |
| HHPC                      | 0.90      | 0.78          | -5.34                         | S6        |
| CF                        | 1.02      | 0.87          | -                             | S7        |
| PD/N-C                    | 0.911     | 0.833         | -5.29                         | S8        |
| D/G-CT <sub>s</sub> -1000 | -         | 0.841         | -6.83                         | S9        |
| MFC <sub>60</sub> -130    | 0.82      | 0.76          | -                             | S10       |
| DN-UGNR                   | 0.957     | 0.808         | -                             | S11       |
| ND-GLC                    | 0.991     | 0.875         | -                             | S12       |
| N-CNSP                    | 0.96      | 0.85          | -6.1                          | S13       |

## References

- S1. S. Huang, Y. Meng, Y. Cao, S. He, X. Li, S. Tong and M. Wu, *Appl. Catal. B Environ.*, 2019, **248**, 239-248.
- S2.H. Jiang, J. Gu, X. Zheng, M. Liu, X. Qiu, L. Wang, W. Li, Z. Chen, X. Ji and J. Li, *Energy Environ. Sci.*, 2019, **12**, 322-334.
- S3.S. Yi, X. Qin, C. Liang, J. Li, R. Rajagopalan, Z. Zhang, J. Song, Y. Tang, F. Cheng, H. Wang and M. Shao, *Appl. Catal. B Environ.*, 2020, **264**, 118537-118547.
- S4.Y. Bian, H. Wang, J. Hu, B. Liu, D. Liu and L. Dai, *Carbon*, 2020, **162**, 66-73.
- S5.Q. Wang, Y. Lei, Y. Zhu, H. Wang, J. Feng, G. Ma, Y. Wang, Y. Li, B. Nan, Q. Feng, Z. Lu and H. Yu, *ACS Appl. Mater. Inter.*, 2018, **10**, 29448-29456.
- S6.X. Xiao, X. Li, Z. Wang, G. Yan, H. Guo, Q. Hu, L. Li, Y. Liu and J. Wang, *Appl. Catal. B Environ.*, 2020, **265**, 118603.
- S7.J. Gao, Y. Wang, H. Wu, X. Liu, L. Wang, Q. Yu, A. Li, H. Wang, C. Song, Z. Gao, M. Peng, M. Zhang, N. Ma, J. Wang, W. Zhou, G. Wang, Z. Yin and D. Ma, *Angew. Chem. Int. Ed.*, 2019, **58**, 15089-15097.
- S8.J. Zhu, Y. Huang, W. Mei, C. Zhao, C. Zhang, J. Zhang, I. S. Amiin and S. Mu, *Angew. Chem. Int. Ed.*, 2019, **58**, 3859-3864.
- S9.F. Kong, Y. Qiao, C. Zhang, X. Fan, A. Kong and Y. Shan, *Nano Research*, 2020, **13**, 401-411.
- S10.M. R. Benzigar, S. Joseph, H. Ilbeygi, D.-H. Park, S. Sarkar, G. Chandra, S. Umopathy, S. Srinivasan, S. N. Talapaneni and A. Vinu, *Angew. Chem. Inter. Ed.*, 2018, **57**, 569-573.
- S11.J. Zhang, Y. Sun, J. Zhu, Z. Gao, S. Li, S. Mu and Y. Huang, *Adv. Sci.*, 2018, **5**, 1801375-1801381.
- S12.J. Zhang, Y. Sun, J. Zhu, Z. Kou, P. Hu, L. Liu, S. Li, S. Mu and Y. Huang, *Nano Energy*, 2018, **52**, 307-314.
- S13.L. Zong, W. Wu, S. Liu, H. Yin, Y. Chen, C. Liu, K. Fan, X. Zhao, X. Chen, F. Wang, Y. Yang, L. Wang and S. Feng, *Energy Storage Mater.*, 2020, **27**, 514-521.
